# Supplementary material for: FOXM1 regulates proliferation, senescence and oxidative stress in keratinocytes and cancer cells
Source: PubMed Central journal article supplement (PMC4993337; doi:10.18632/aging.100988), 2016-07-03
Supplement: aging-08-1384-s001.pdf [file aging-08-1384-s001.pdf]

wide profiling of p63 DNA-binding sites identifies an element that regulates gene expression during limb development in the 7q21 SHFM1 locus. *PLoS Genet.* 2010; 6:100106.

## SUPPLEMENTARY DATA

### FOXM1 gene on UCSC genome browser (p63 ChIP-SEQ)

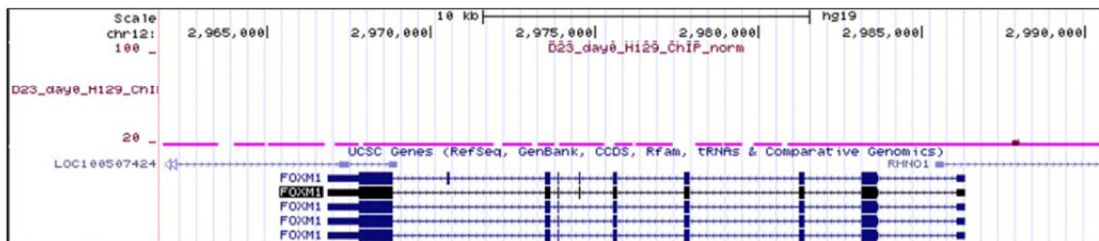

### KRT14 gene on UCSC genome browser (p63 ChIP-SEQ)

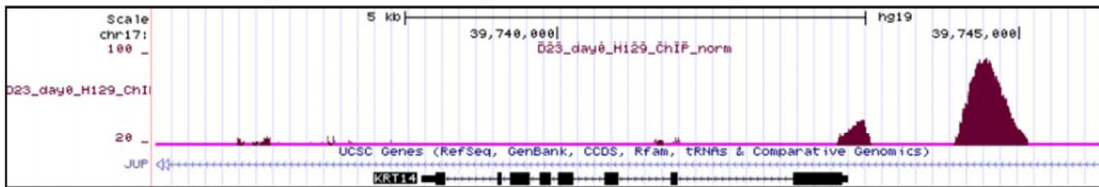

**Figure S1.** A screen-shot from UCSC genome browser (<https://genome.ucsc.edu/>) showing the peaks of p63-ChIP-seq performed in proliferating keratinocytes (GSE59827). *KRT14* gene was used as a positive control.

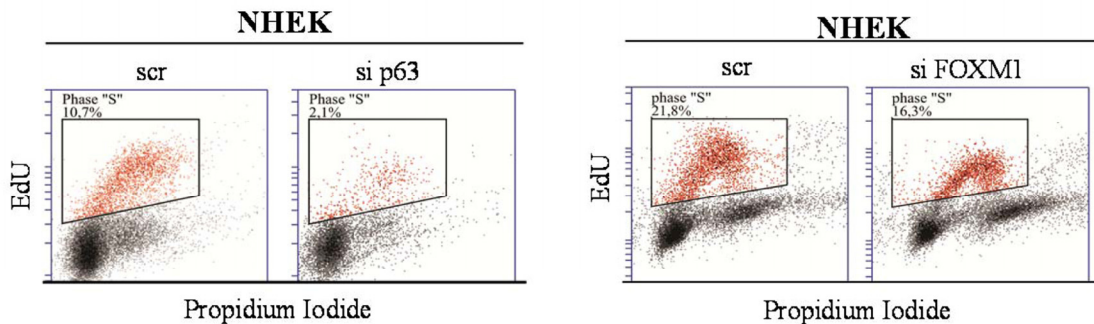

**Figure S2.** Dot-plots representing quantification of EdU-positive cells by FACS in NHEK silenced for sip63 or FOXM1.

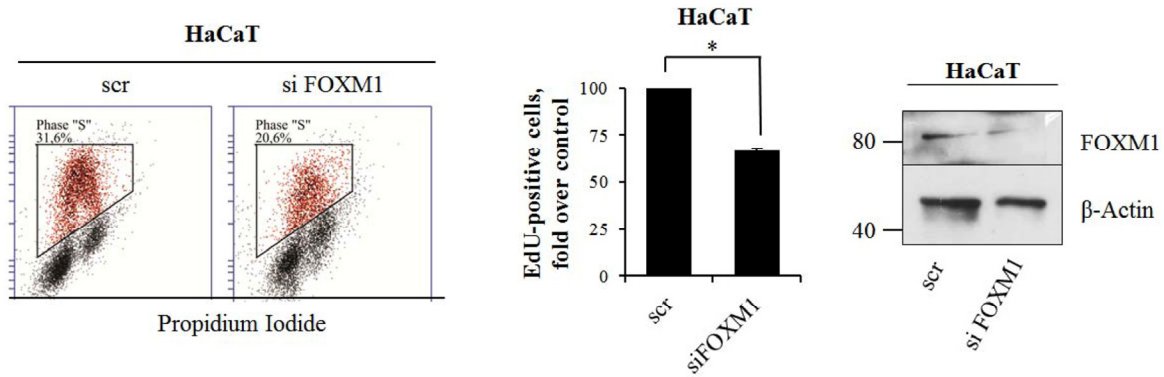

**Figure S3.** FOXM1 level correlates with proliferation status of keratinocytes. HaCaT cells were silenced for FOXM1 for 96h and then EdU-incorporation assay was performed. Percentage of EdU-positive cells was analysed by FACS. Western blots confirm the silencing. Values reported are the average  $\pm$  SD of two independent experiments. \*p-Value <0.01 by Student's t-test.
