# Supplementary material for: FOXM1 regulates proliferation, senescence and oxidative stress in keratinocytes and cancer cells
Source: publisher site journal article supplement (doi:10.18632/aging.100988), 2016-07-03
Supplement: Supplementary file 1 [file aging-v8i7-100988-supplementary-material-SD1.pdf]

SUPPLEMENTARY DATA

FOXM1 gene on UCSC genome browser (p63 ChIP-SEQ)

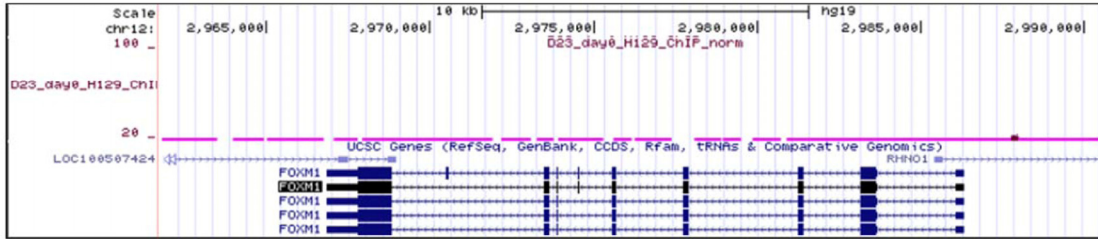

KRT14 gene on UCSC genome browser (p63 ChIP-SEQ)

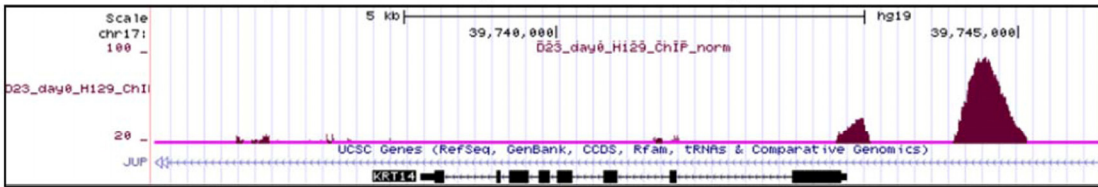

**Figure S1.** A screen-shot from UCSC genome browser (<https://genome.ucsc.edu/>) showing the peaks of p63-ChIP-seq performed in proliferating keratinocytes (GSE59827). *KRT14* gene was used as a positive control.

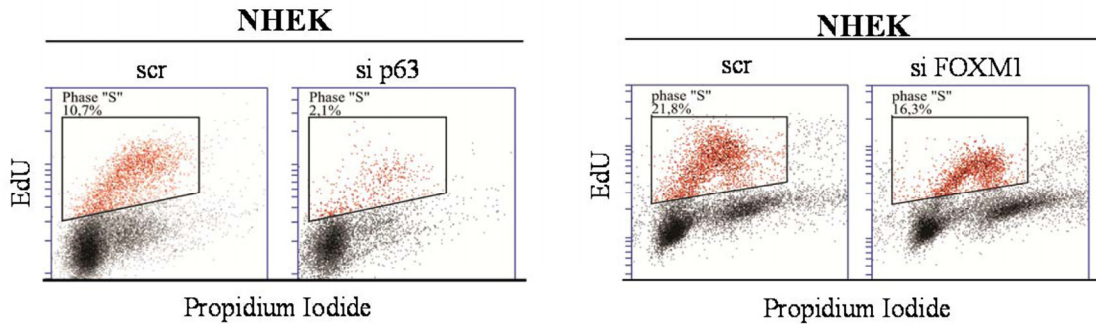

**Figure S2.** Dot-plots representing quantification of EdU-positive cells by FACS in NHEK silenced for sip63 or FOXM1.

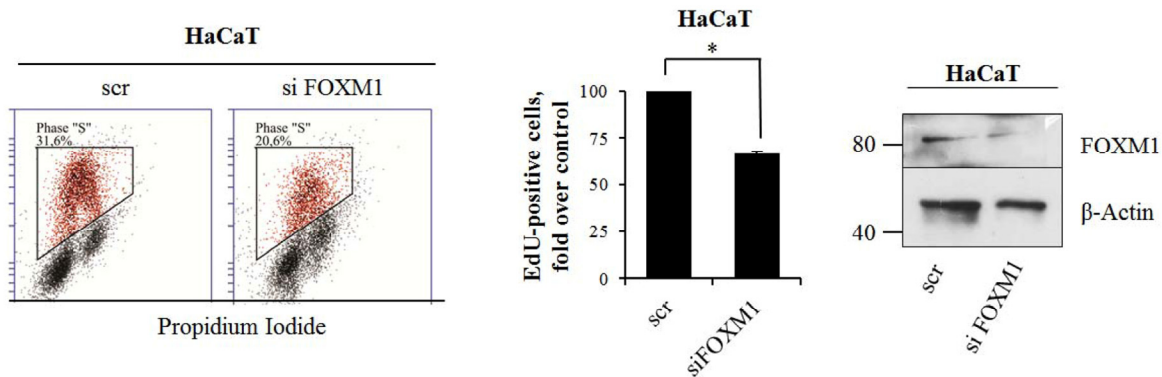

**Figure S3.** FOXM1 level correlates with proliferation status of keratinocytes. HaCaT cells were silenced for FOXM1 for 96h and then EdU-incorporation assay was performed. Percentage of EdU-positive cells was analysed by FACS. Western blots confirm the silencing. Values reported are the average  $\pm$  SD of two independent experiments. \*p-Value <0.01 by Student's t-test.
